## ACKNOWLEDGMENT

The Editor-in-Chief and the Editors of ANESTHESIOLOGY would like to thank the following individuals for their participation in the editorial review process. Their contribution is sincerely appreciated.

- Amr E. Abouleish, M.D., M.B.A.  
Anthony Absalom, M.B., Ch.B., F.R.C.A., M.D.  
Pierre Albaladejo, M.D., Ph.D.  
Cesar Aldecoa, M.D.  
Michael T. Alkire, M.D.  
Julien Amour, M.D., Ph.D.  
T. Anthony Anderson, Ph.D., M.D.  
Dean B. Andropoulos, M.D., M.H.C.M.  
Martin S. Angst, M.D.  
James M. Anton, M.D.  
Jeffrey L. Apfelbaum, M.D.  
Cristian Arzola, M.D., M.Sc.  
Michael S. Avidan, M.B., B.Ch., F.C.A.  
Douglas R. Bacon, M.D., M.A.  
Angela M. Bader, M.D., M.P.H.  
Aranya Bagchi, M.B.B.S.  
Keith Baker, M.D., Ph.D.  
Daniel Bambridge, M.D., F.R.C.P.C.  
Adam Barrett, M.D.  
Julie Bastarache, M.D.  
Victor C. Baum, M.D.  
Mark G. Baxter, M.D.  
W. Scott Beattie, M.D., Ph.D.  
Francis Beaudry, Ph.D.  
Marc Beaussier, M.D., Ph.D.  
Karin Becke, M.D.  
F. Javier Belda, M.D., Ph.D.  
Giacomo Bellani, M.D., Ph.D.  
Jonathan L. Benumof, M.D.  
Mitchell F. Berman, M.D., M.P.H.  
James M. Berry, M.D.  
Andrew Bersten, M.D.  
Edward Bertaccini, M.D.  
Andreas Beutler, M.D.  
Luca M. Bigatello, M.D.  
Edward Bittner, M.D., Ph.D.  
Robert A. Bjork, M.D.  
Lluís Blanch, M.D., Ph.D.  
Thane Blinman, M.D., F.A.A.P.  
James M. Blum, M.D.  
Richard Howard Blum, M.D., M.S.E.  
M. Danilo Boada M.Sc., Ph.D.  
Simon C. Body, M.B., Ch.B., M.P.H.  
Michael L. Boisen, M.D.  
Lionel Bouvet, M.D., Ph.D.  
Michael Bouvet, M.D.  
John F. Boylan, M.B., F.R.C.P.C.  
Timothy J. Brennan, Ph.D., M.D.  
Charles V. Brown, M.D.  
Emery N. Brown, M.D., Ph.D.  
Karen A. Brown, M.D.  
Robert H. Brown, M.D., M.P.H.  
Sorin J. Brull, M.D., F.C.A.R.C.S.I. (Hon.)  
Donal J. Buggy, M.D., M.Sc., D.M.E., F.R.C.P.I., F.C.A.I., F.R.C.A.  
Nuria E. Cabrera-Benitez Ph.D.  
Maxime Cannesson, M.D., Ph.D.  
Xavier Capdevila, M.D., Ph.D.  
Daniel B. Carr, M.D., M.A.  
Davide Cattano, M.D., Ph.D.  
Maurizio Cecconi, M.D.  
Maurizio Cereda, M.D.  
Havovi Chichger, Ph.D.  
Hovig Chitilian, M.D.  
Frances Chung, M.B.B.S., F.R.C.P.C.  
Randall M. Clark, M.D.  
Mark Coburn, M.D.  
Robert Coghill, Ph.D.  
Edmond Cohen, M.D.  
Joshua B. Cohen, M.D.  
Tim M. Cook, M.B.B.S., B.A., F.R.C.A.  
Jamie Cooper, B.M.B.S., M.D., F.R.A.C.P., F.C.I.C.M.  
Jeffrey B. Cooper, Ph.D.  
Richard M. Cooper, M.D., F.R.C.P.C.  
Craig Coopersmith, M.D.  
Irene Cortes-Puch, M.D.  
Charles J. Coté, M.D.  
Joseph F. Cotten, M.D., Ph.D.  
C. Michael Crowder, M.D., Ph.D.  
Gerard F. Curley, M.B., Ph.D., F.C.A.R.C.S.I.  
Jarrod E. Dalton, Ph.D.  
Andrew J. Davidson, M.D., M.B.B.S., F.A.N.Z.C.A.  
Melinda J. Davis, B.Med., F.A.N.Z.C.A.  
Hans Donald de Boer, M.D., Ph.D.  
Stefan G. De Hert, M.D., Ph.D.  
Vincent Degos, M.D., Ph.D.  
J. Mauricio Del Rio, M.D.  
Mark Dershwitz, M.D., Ph.D.  
Zeruesenay Desta, Ph.D.  
Philip J. Devereaux, M.D., Ph.D.  
Pascale Dewachter, M.D., Ph.D.  
Franklin Dexter, M.D., Ph.D.  
Gilles Dhonneur, M.D., Ph.D.  
Pierre A. Diemunsch, M.D., Ph.D.  
Wulf Dietrich, M.D., Ph.D.  
Brian S. Donahue, M.D., Ph.D.  
François Donati, Ph.D., M.D., F.R.C.P.C.  
Patrick M. Dougherty, Ph.D.  
Tomas Drabek, M.D., Ph.D.  
Asbjørn M. Drewes, M.D., Ph.D., D.M.Sc.  
John C. Drummond, M.D., F.R.C.P.C.  
Laura Virginia Duggan, M.D.  
Richard P. Dutton, M.D., M.B.A.  
Robert H. Dworkin, Ph.D.  
Thomas J. Ebert, M.D., Ph.D.  
Roderic G. Eckenhoff, M.D.  
Talmage D. Egan, M.D.  
Matthias Eikermann, M.D., Ph.D.  
Douglas J. Eleveld, Ph.D.  
Milo Engoren, M.D.  
Thomas O. Erb, M.D., M.H.S.  
Lars I. Eriksson, M.D., Ph.D.  
Tobias Everett, M.D.  
Lisa W. Faberowski, M.D.  
David Faraoni, M.D., Ph.D., F.C.C.P.  
Ludwik Fedorko, Ph.D., M.D., F.R.C.P.C.  
John R. Feiner, M.D.  
Niall Ferguson, M.D., M.Sc.  
Ana Fernandez-Bustamante, M.D., Ph.D.  
Marc-Olivier Fischer, M.D.  
Dennis M. Fisher, M.D.  
Pamela Flood, M.D.  
Manuel L. Fontes, M.D.  
Patrice Forget, M.D., Ph.D.  
Steven M. Frank, M.D.  
Gyorgy Frendl, M.D.  
Marcelo Gama de Abreu, M.D., M.Sc., Ph.D., D.E.S.A.  
Pedro L. Gambús, M.D.  
Paul S. Garcia, M.D., Ph.D.  
Lene H. Garvey, M.D., Ph.D.,  
Simon Gelman, M.D.  
Peter Gerner, M.D.  
Kamrouz Ghadimi, M.D.  
Mark Gladwin, M.D.  
David B. Glick, M.D., M.B.A.  
Lawrence T. Goodnough, M.D.  
Carina Graversen, Ph.D.  
Andrew T. Gray, M.D., Ph.D.  
Steven Brett Greenberg, M.D.  
Hilary Peter Grocott, M.D., F.R.C.P.C.  
Eric R. Gross, M.D., Ph.D.  
Oliver Grottko, M.D., Ph.D.  
Kerry Gunn, M.B.Ch.B., F.A.N.Z.C.A., D.A.  
Ashraf S. Habib, M.B.B.Ch., M.Sc., M.H.Sc., F.R.C.A.  
Walid Habre, M.D., Ph.D.  
Admir Hadzic, M.D., Ph.D.  
Guy S. Haller, M.D., Ph.D.  
Samuel Hankins, M.D.  
Tobias Hannes, M.D.  
David N. F. Harris, M.D.  
Richard E. Harris, Ph.D.  
Stephen Thomas Harvey, M.D.  
Goran Hedenstierna, M.D.  
Eugenie Heitmiller, M.D., F.A.A.P.  
Jan F. A. Hendrickx, M.D., Ph.D.  
Thomas K. Henthorn, M.D.  
David L. Hepner, M.D., M.P.H.  
Douglas L. Hester, M.D.  
David R. Hillman, M.D.  
Ion A. Hobai, M.D., Ph.D.  
Kirk J. Hogan, M.D.  
Quinn H. Hogan, M.D.  
Charles W. Hogue, Jr., M.D.  
John B. Holcomb, M.D., F.A.C.S.  
Jonas Holm, M.D.  
Masatoshi Hori, Ph.D., D.V.M.  
Charlotte Hotchkiss, M.D.  
Han Huang, M.D.  
Rolf D. Hubmayr, M.D.  
Anthony G. Hudetz D.B.M., Ph.D.  
Andrew Hudson, M.D., Ph.D.  
María Hurlé, M.D., Ph.D.  
Shaukat Husain, M.D.  
James William Ibinson, M.D., Ph.D.  
Harald Ihmsen, Ph.D.  
Brian M. Ilfeld, M.D., M.S.  
Seiji Ishikawa, M.D.  
Teruhiko Ishikawa, M.D.  
Bruce R. Ito, Ph.D.  
Christian Jeleazcov, M.D., M.Sc.  
Shaman Jhanji, Ph.D., M.R.C.P., F.R.C.A., F.F.I.C.M.  
Stephen Mark Johnson, M.D., Ph.D.  
R. Carter W. Jones III, M.D., Ph.D.  
Malin Jonsson Fagerlund, M.D., Ph.D.

- Siddhartha Joshi, M.D.  
 Jeremy M. Kahn, M.D.  
 Eija Kalso, M.D.  
 Sabine B. R. Kästner, M.D., Ph.D.  
 Masahiko Kawaguchi, M.D.  
 Franz Kehl, M.D., Ph.D., D.E.A.A.  
 Henrik Kehlet, M.D., Ph.D.  
 Steven E. Kern, Ph.D.  
 Eric Kipnis, M.D., Ph.D.  
 Erik B. Kistler, M.D., Ph.D.  
 Yuji Kitamura, M.D., Ph.D.  
 Markus G. Klass, M.D., Ph.D.  
 Masayuki Kobayashi, D.D.S., Ph.D.  
 Lee Koetzner, Ph.D.  
 W. Andrew Kofke, M.D., M.B.A.  
 Aaron F. Kopman, M.D.  
 Vincent J. Kopp, M.D.  
 Yoshifumi Kotake, M.D., Ph.D.  
 Tom C. Krejcie, M.D.  
 John Kress, M.D.  
 Anand Kumar, M.D., F.R.C.P.C., F.C.C.P., F.C.C.M.  
 C. Dean Kurth, M.D.  
 Andrea Kurz, M.D.  
 John G. Laffey, M.D., M.A., F.C.A.I.  
 Arthur M. Lam, M.D., F.R.C.P.C.  
 David G. Lambert, Ph.D.  
 Olivier Langeron, M.D., Ph.D.  
 William L. Lanier, M.D.  
 Merlin D. Larson, M.D.  
 Patricia M. Lavand'homme, M.D., Ph.D.  
 Yannick Le Manach, M.D., Ph.D.  
 Andreas Leffler, M.D.  
 Jerrold Lerman, M.D., F.R.C.P.C., F.A.N.Z.C.A.  
 Adam B. Lerner, M.D.  
 Jon Levine, M.D., Ph.D.  
 Wilton C. Levine, M.D.  
 J. Lance Lichter, M.D.  
 Alan Light, Ph.D.  
 Mike T. Lin, Ph.D.  
 Sten G. E. Lindahl, M.D., Ph.D.  
 David Lindström, M.D., Ph.D.  
 Eugene G. Lipov, M.D.  
 Philipp Lirk, M.D., Ph.D.  
 Andreas W. Loepke, M.D., Ph.D.  
 Jeffrey Loh, M.D.  
 Frederick Wilhelm Lombard, M.B., Ch.B.  
 Dan Longrois, M.D., Ph.D.  
 Torsten Loop, M.D.  
 Isabel Lüthy, Ph.D.  
 Ralph Lydic, Ph.D.  
 Daqing Ma, M.D., Ph.D.  
 Neil MacIntyre, M.D.  
 M. Bruce MacIver M.Sc., Ph.D.  
 G. Burkhard Mackensen, M.D., Ph.D.  
 Aman Mahajan, M.D., Ph.D.  
 Ravi P. Mahajan, M.D.  
 Kamal Maheshwari, M.D., M.P.H.  
 Jeff E. Mandel, M.D., M.S.  
 Ashham Mansur, M.D.  
 Edward R. Mariano, M.D., M.A.S.  
 Paul Ellis Marik, M.D.  
 John J. Marini, M.D.  
 Thomas J. Martin, Ph.D.  
 Jean Marty, M.D.  
 Edward Mascha, Ph.D.  
 Kenichi Masui, M.D., Ph.D.  
 Bryan G. Maxwell, M.D., M.P.H.  
 C. David Mazer, M.D., F.R.C.P.C.  
 Eamon P. McCarron, M.B.Ch.B., M.Phil.  
 David L. McDonagh, M.D.  
 Sandro Mecozzi, Ph.D.  
 Briseida Mema, M.D., F.R.C.P.C.  
 Stavros G. Memtsoudis, M.D., Ph.D., F.C.C.P.  
 Patrick Meybohm, M.D.  
 Neil Richard Miller, M.D.  
 Ronald D. Miller, M.D., M.S.  
 Rebecca D. Minehart, M.D.  
 Mahad Minhas M.P.H.  
 Marek A. Mirski, M.D.  
 Ann M. Moller, M.D.  
 Terri G. Monk, M.D., M.S.  
 Antoine Monsel, M.D., MSc.  
 Iain Moppett, M.B., B.Chir., M.A., M.R.C.P., F.R.C.A., D.M.  
 Timothy E. Morey, M.D.  
 Phil G. Morgan, M.D.  
 Sohaail M. Mulla, Ph.D.  
 John M. Murkin, M.D., F.R.C.P.C.  
 Gavin James Murphy, M.B.Ch.B.  
 Glenn S. Murphy, M.D.  
 David J. Murray, M.D.  
 Nader D. Nader, M.D., Ph.D., F.C.C.P.  
 Olubukola Olugbenga Nafiu, M.D., F.R.C.A., M.S.  
 Mohamed Naguib, M.B., B.Ch., M.Sc., F.C.A.R.C.S.I., M.D.  
 Charles Natanson, M.D.  
 Stefano Nava, M.D.  
 Joseph M. Neal, M.D.  
 Edward C. Nemerbut, M.D.  
 Warwick D. Ngan Kee, M.B.Ch.B., F.A.N.Z.C.A., M.D.  
 Ellen Niederberger, Ph.D.  
 Vance G. Nielsen, M.D.  
 Diederik Nieuwenhuijs, M.D., Ph.D.  
 Alastair F. Nimmo, M.B., Ch.B., F.R.C.A.  
 Takashi Nishino, M.D.  
 Ala Nozari, M.D., Ph.D.  
 Michael F. O'Connor, M.D.  
 Erik Olofsen, M.Sc.  
 Steven L. Orebaugh, M.D.  
 Fredrick K. Orkin, M.D., M.B.A., S.M.  
 Gail Otulakowski, Ph.D.  
 Robert L. Owens, M.D.  
 Nathan L. Pace, M.D., M.Stat.  
 Ben Julian A. Palanca, M.D., Ph.D., M.Sc.  
 Susan K. Palmer, M.D.  
 Peter H. Pan, M.D.  
 Jean-Jaques Parienti, M.D., Ph.D.  
 Matteo Parotto, M.D., Ph.D.  
 Gavril W. Pasternak, M.D., Ph.D.  
 Hemal H. Patel, Ph.D.  
 Amol Patwardhan, M.D., Ph.D.  
 Gary Peltz, M.D., Ph.D.  
 Anahi Perlas, M.D.  
 Christopher Michael Peters, Ph.D.  
 Dominique Piquette, M.D., Ph.D.  
 Romain Pirracchio, M.D., Ph.D.  
 Benoit Plaud, M.D., Ph.D.  
 David Anthony Provenzano, M.D.  
 Kane O. Pryor, M.D.  
 Quintin Jose Quinones, M.D., Ph.D.  
 Douglas E. Raines, M.D.  
 Srinivasa N. Raja, M.D.  
 Satya Krishna Ramachandran, M.D., F.R.C.A.  
 Gerhard Rammes, Ph.D.  
 Mathieu Raux, M.D., Ph.D.  
 Aeyal Raz, M.D., Ph.D.  
 Philippe Richebé, M.D., Ph.D.  
 Bernhard Riedel M.B.Ch.B., F.C.A., F.A.H.A., F.A.N.Z.C.A., M.Med., M.B.A., Ph.D.  
 Matthias L. Riess, M.D., Ph.D.  
 Ann Rigby-Jones, Ph.D.  
 Joseph Brian Rinehart, M.D.  
 Bruno Riou, M.D., Ph.D.  
 Mark D. Rollins, M.D., Ph.D.  
 Richard W. Rosenquist, M.D.  
 Steven Roth, M.D., F.A.R.V.O.  
 Damien Roux, M.D., Ph.D.  
 Marc A. Rozner, Ph.D., M.D.  
 Kurt Ruetzler, M.D.  
 James A. Russell, M.D.  
 Peter V. Sackey, M.D.  
 Senthilkumar Sadhasivam, M.D., M.P.H.  
 Bryan Sakamoto, M.D., Ph.D.  
 Jeffrey W. Sall, M.D., Ph.D.  
 Charles-Marc Samama, M.D., Ph.D.  
 Robert D. Sanders, B.Sc., M.B.B.S., Ph.D., F.R.C.A.  
 NavParkash Singh Sandhu, M.S., M.D.  
 Nils Schallner, M.D.  
 Jörn Schäper, M.D.  
 Scott A. Schartel, D.O.  
 Gregory Scherrer, Ph.D.  
 Michael Schlame, M.D.  
 Ulrich H. Schmidt, M.D., Ph.D.  
 Gerhard Schneider, M.D.  
 Mark E. Schroeder, M.D.  
 Peter M. Schulman, M.D.  
 Stephan K. W. Schwarz, M.D., Ph.D., F.R.C.P.C.  
 John Sear, M.B.B.S., Ph.D.  
 Christoph Nikolaus Seubert, M.D., Ph.D.  
 Steven L. Shafer, M.D.  
 Muhammad I. Shaikh, M.D., Ph.D.  
 Areyeh Shander, M.D., F.C.C.M., F.C.C.P.  
 Amy Shanks, Ph.D.  
 Edward R. Sherwood, M.D., Ph.D.  
 Liyun Shi, M.D., Ph.D.  
 Sasha Shillcutt, M.D., F.A.S.E.  
 Yusuke Shiozawa, M.D., Ph.D.  
 Brendan S. Silbert, M.B., B.S., F.A.N.Z.C.A.  
 Yoanna Skrobik, M.D., F.R.C.P.C.  
 William Sliker, Ph.D.  
 Peter D. Slinger, M.D.  
 Erica Sloan, M.D.  
 Richard M. Smiley, M.D., Ph.D.  
 Shad Smith, M.D.  
 Ban Leong Sng, M.B.B.S., M.Med., F.A.N.Z.C.A., F.F.P.M.A.N.Z.C.A.  
 Ken Solt, M.D.  
 Sulpicio G. Soriano, M.D.

Donat Rudolf Spahn, M.D., F.R.C.A.  
 Claudia D. Spiess, M.D.  
 Bruce D. Spiess, M.D.  
 Christina Marie Spofford, M.D., Ph.D.  
 Creed M. Stary, M.D., Ph.D.  
 Randolph H. Steadman, M.D., M.S.  
 Derek Steele, B.Sc., Ph.D.  
 Ola Stenqvist, M.D.  
 Marjorie P. Stiegler, M.D.  
 David A. Story, M.B.B.S., B.Med.Sci.,  
 M.D., F.A.N.Z.C.A.  
 Gary R. Strichartz, Ph.D.  
 Robert A. Strickland, M.D.  
 Kingman P. Strohl, M.D.  
 Michel M. R. F. Struys, M.D., Ph.D.,  
 F.R.C.A.  
 Audun Stubhaug, M.D., Ph.D.  
 Astrid G. Stucke, M.D.  
 Balachundhar Subramaniam, M.B.B.S.,  
 M.D., M.P.H.  
 Anthony Suffredini, M.D.  
 Sophie Susen, M.D., Ph.D.  
 Akihiro Suzuki, M.D., Ph.D.  
 Peter Szmuk, M.D.  
 Maral Tajerian, Ph.D.  
 Jukka Takala, M.D., Ph.D.  
 Masao Takata, M.D., Ph.D.  
 Daniel Talmor, M.D., M.P.H.  
 Kenichi A. Tanaka, M.D., M.Sc.  
 Vivianne Tawfik, M.D., Ph.D.  
 Cormac Taylor, Ph.D.  
 Richard Teplick, M.D.  
 Abdullah Sulieman Terkawi, M.D.  
 Niccolo Terrando, Ph.D.  
 Oliver M. Theusinger, M.D.  
 Robert H. Thiele, M.D.  
 Michael M. Todd, M.D.  
 Daniel A. Tolpin, M.D.  
 Ashley Tonidandel, M.D.  
 Peter H. Tonner, M.D.  
 Antoni Torres, M.D., Ph.D.  
 Lawrence C. Tsen, M.D.  
 Avery Tung, M.D.  
 Christa Van Dort, Ph.D.  
 Dimitra Vassiliadi, M.D.  
 Susan T. Verghese, M.D.  
 Robert A. Veselis, M.D.  
 Thomas R. Vetter, M.D., M.P.H.  
 Jean-Louis Vincent, M.D., Ph.D.  
 Brent A. Vogt, Ph.D.  
 Effrossyni G. Votta-Velis, M.D., Ph.D.  
 Laszlo Vutskits, M.D., Ph.D.  
 Gebhard Wagener, M.D.  
 Michael Wagner, M.D., Ph.D.  
 Nana-Maria Wagner, M.D.  
 Brian Wainger, M.D., Ph.D.  
 Allan J. Walkey, M.D., M.Sc.  
 Keith R. Walley, M.D., F.R.C.P.C.  
 Jonathan P. Wanderer, M.D., M.Phil.  
 David O. Warner, M.D.  
 Mark A. Warner, M.D.  
 Mehernoor F. Watcha, M.D.  
 Guy L. Weinberg, M.D.  
 Richard B. Weiskopf, M.D.  
 Jennifer Weller, M.D., M.B.B.S., M.Clin.  
 Ed., F.A.N.Z.C.A.  
 Ian James Welsby, M.B.B.S.  
 Jeanine P. Wiener-Kronish, M.D.  
 Duminda Nalaka Wijeyesundera, M.D.,  
 Ph.D.  
 Brian A. Williams, M.D., M.B.A.  
 Christopher Glenn Wilson, Ph.D.  
 Tilo Winkler, Ph.D.  
 Brent Winston, M.D.  
 Harvey J. Woehlck, M.D.  
 Cynthia A. Wong, M.D.  
 Hector Wong, M.D.  
 Albert W. Wu, M.D.  
 Zhongcong Xie, M.D., Ph.D.  
 Sophia Yi, M.D.  
 Sloan C. Youngblood, M.D.  
 Jarred Younger, Ph.D.  
 Kai Zacharowski, M.D., Ph.D.  
 Michael Zaugg, M.D., M.B.A., F.R.C.P.C.  
 Fadel Zeidan, Ph.D.  
 Alice Zemljic-Harpe, M.D.  
 Haibo Zhang, M.D., Ph.D.  
 John H. Zhang, M.D., Ph.D.  
 Patrick Ziemann-Gimmel, M.D.  
 Zhiyi Zuo, M.D., Ph.D.
